# Supplementary material for: Microcalorimetric Quantification of Hydrogen Adsorption Thermodynamics in Water-Solvated Systems on Pt/C
Source: Royal Society of Chemistry journal article supplement (doi:10.1039/d5fd00170f), 2026-01-01
Supplement: d5fd00170f1.pdf [file d5fd00170f1.pdf]

# Microcalorimetric Quantification of Hydrogen Adsorption Thermodynamics in Water-Solvated Systems on Pt/C

## Supplementary Information

William T. Broomhead and David W. Flaherty\*

*School of Chemical and Biomolecular Engineering, Georgia Institute of Technology, Atlanta, GA  
30032, United States*

\* Corresponding author. [dflaherty3@gatech.edu](mailto:dflaherty3@gatech.edu)

|                                                                                                              |     |
|--------------------------------------------------------------------------------------------------------------|-----|
| S1. N <sub>2</sub> Physisorption Isotherms of Pt Catalysts.....                                              | S2  |
| S2. Transmission Electron Microscopy of Pristine Pt/C Catalysts .....                                        | S3  |
| S3. Schematic and Operation of the Isothermal Adsorption Calorimetry System .....                            | S4  |
| S4. Adsorption Isotherms for CO and H <sub>2</sub> in the Absence of Water .....                             | S7  |
| S5. Adsorption Isotherms for H <sub>2</sub> on Pt/C with Varying Water Activities.....                       | S9  |
| S6. Effects of Intraparticle Carbon Dilution on Uptakes and Heats of H <sub>2</sub> Adsorption on Pt/C ..... | S10 |
| S7. Differential Enthalpies, Entropies, and Free Energies for Hydrogen Adsorption on Pt/C .....              | S12 |
| S8. Gas Phase Batch Profiles and CO Consumption Rates on Pt/C.....                                           | S13 |
| S9. Adsorption Isotherms and Differential Heats for CO Adsorption on Pt/C with Water .....                   | S14 |

## S1. N<sub>2</sub> Physisorption Isotherms of Pt Catalysts

Figure S1 provides the N<sub>2</sub> adsorption-desorption isotherms for Pt/C and Pt/Al<sub>2</sub>O<sub>3</sub> catalysts at 77 K. Specific surface areas were estimated from uptakes in N<sub>2</sub> activity ( $P/P^0$ ) range of 0.05–0.3 following the method of Brunauer, Emmett, and Teller (BET). For Pt/C, this method gives specific surface areas of  $106 \pm 8 \text{ m}^2 \text{ g}^{-1}$ .

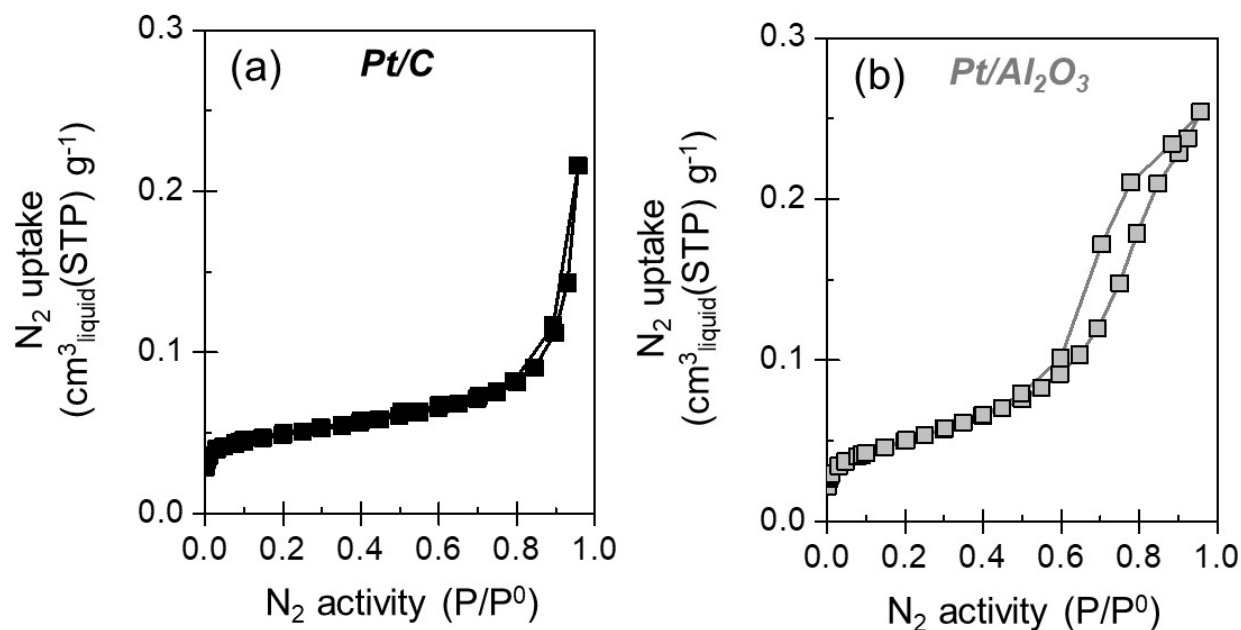

**Figure S1.** N<sub>2</sub> physisorption isotherms for (a) Pt/C and (b) Pt/Al<sub>2</sub>O<sub>3</sub> catalysts. Solid lines are provided to guide the eye.

## S2. Transmission Electron Microscopy of Pristine Pt/C Catalysts

Figure S2 provides a representative transmission electron micrograph of the Pt/C catalysts.

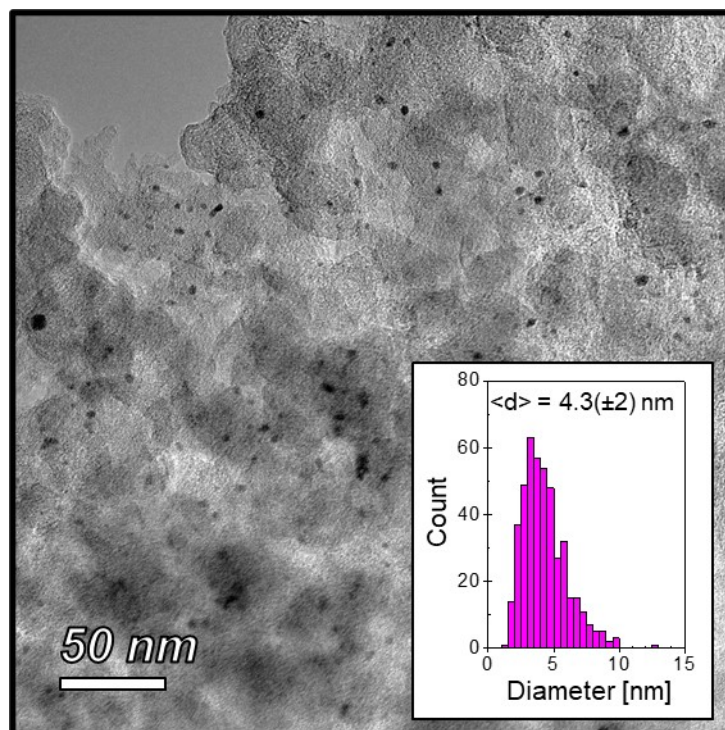

**Figure S2.** Transmission electron micrograph of Pt/C catalysts with a histogram of cluster diameters provided as an inset.

### S3. Schematic and Operation of the Isothermal Adsorption Calorimetry System

Figure S3 provides a schematic representation of the system used for isothermal adsorption calorimetry in this study. The system connects a volumetric adsorption device (Micromeritics, 3Flex) with precise control over the molar quantities of delivery gases as well as H<sub>2</sub>O vapor, connected to a vacuum ampoule for insertion in an isothermal microcalorimeter (TA instruments, TAM IV). A flexible stainless steel tubing connection between the two instruments enabled movement between a treatment zone—where catalysts were exposed to temperatures up to 473 K—and the calorimeter while retaining a dynamic evacuation. We emphasize that both systems are commercially available and flexible for a wide range of adsorbents, adsorbates, and solvent environments.

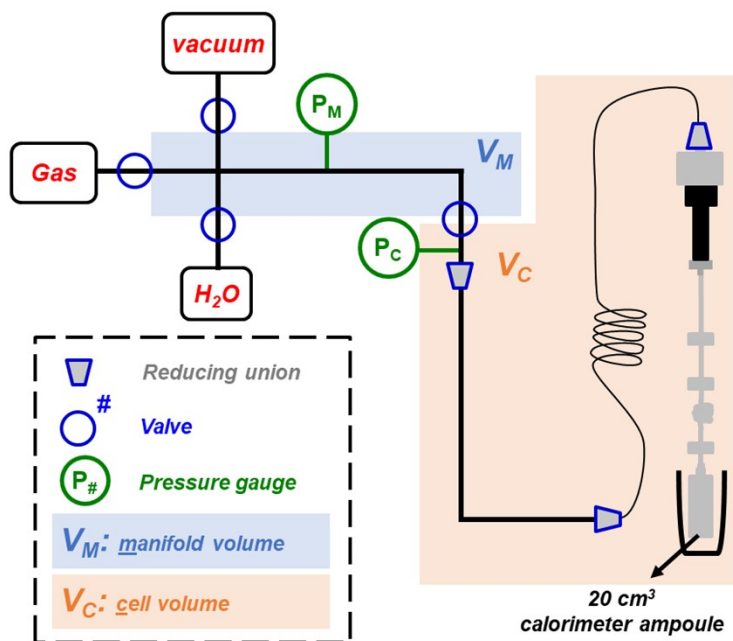

**Figure S3.** Simplified schematic of a connected volumetric adsorption-microcalorimeter system.

For each dose, the volumetric adsorption device enabled precise quantification of both the number of moles dosed ( $n_{dose}$ ) and pressure change ( $\Delta P$ ) while the calorimeter provided the cumulative heat flow ( $Q_{measured}$ ). The molar uptake ( $\Delta n_{ads}$ ) equals the difference in  $n_{dose}$  and the final number of moles ( $n_{final}$ ) accounting for the number of moles initially in the system prior to each dose ( $n_{initial}$ ):

$$\Delta n_{ads} = n_{dose} - (n_{final} - n_{initial}) \quad (S3.1)$$

Eqn. S3.1 applies for each component. Doses of He, CO, and H<sub>2</sub> gases in the presence of H<sub>2</sub>O but in non-adsorbing environments (i.e.,  $\Delta n_{ads} = 0$ , Figure S4a) calibrate the gas expansion through  $\Delta P$  to give  $n_{final}$  following the ideal gas law (pressure, temperature, and volume subscripts referring to manifold and cell in Figure S3):

$$n_{dose} = n_{final} - n_{initial} = \frac{1}{R} \left( \frac{V_m}{T_m} + \frac{V_c}{T_c} \right) \Delta P_c \quad (S3.2)$$

In each dose, measured heat flows ( $Q_{measured}$ ) consisted of contributions from adsorption ( $Q_{ads}$ ) as well as gas expansion  $Q_{expansion}$ , the latter due to the increase in the number of molecules of gas in the calorimeter control volume:

$$Q_{measured} = Q_{ads} + Q_{expansion} \quad (S3.3)$$

Expansion heats tended to follow power law relations with respect to  $\Delta P$  but differed for each adsorbate mixture due to differences in the heat capacities of each gas composition. Thus,  $Q_{expansion}$  values were estimated at the end of each adsorption experiment when  $\Delta n_{ads}$  approached zero; validating this approach with He reveals a negligible enthalpy of He adsorption ( $\Delta H_{ads,He} = -Q_{ads}$ , Figure S4b).

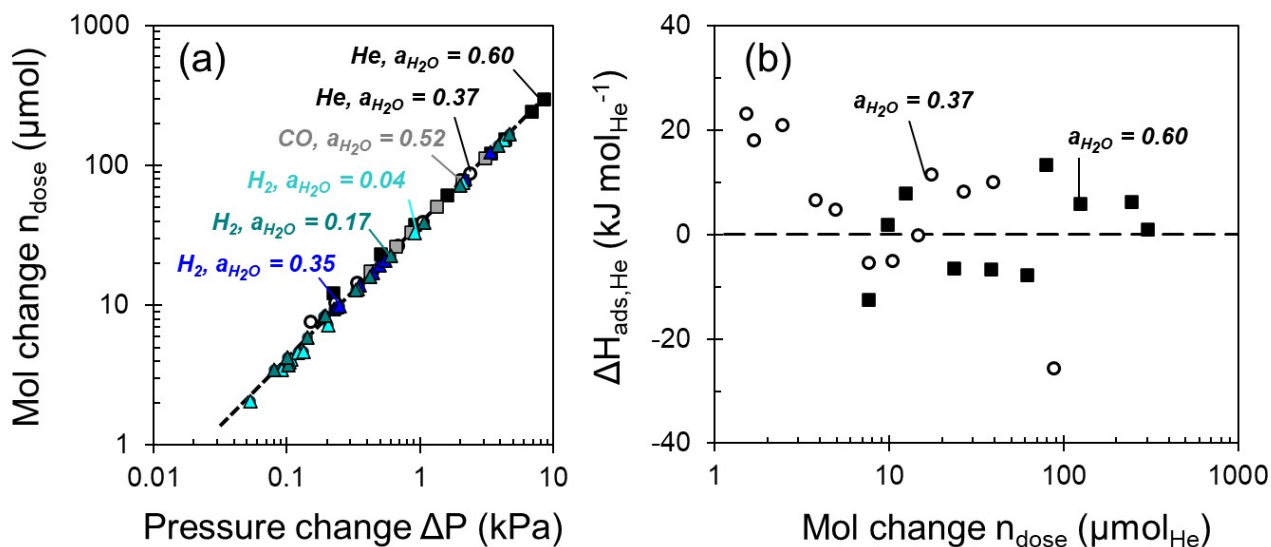

**Figure S4.** Validation of (a) cell volume calculations (Eqn. S3.2) for He (black), CO (gray), and H<sub>2</sub> (blue) and (b) expansion heat calibration methods for He ( $\Delta H_{ads,He} = -Q_{ads} = 0$ ). 1.0 g Pt/C, 298 K.

Prior to adsorption measurements with H<sub>2</sub>O, a molar quantity of H<sub>2</sub>O vapor was introduced to reach its desired thermodynamic activity. Figure S5 provides the H<sub>2</sub>O adsorption isotherm for Pt/C as the molar uptake (primary y-axis) and the average H<sub>2</sub>O per nm<sup>2</sup> (secondary y-axis).

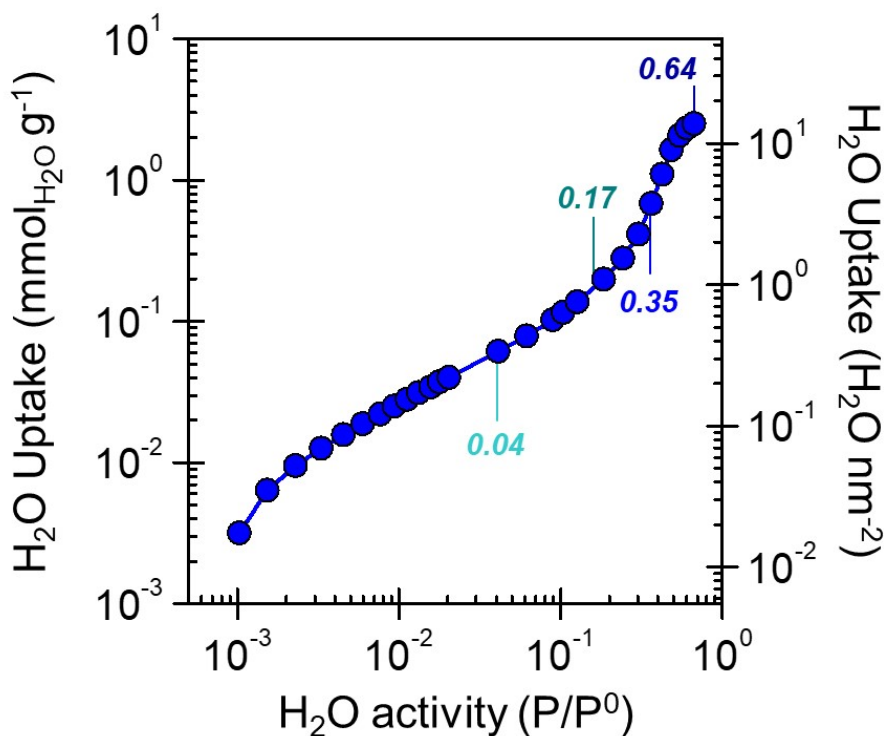

**Figure S5.** H<sub>2</sub>O adsorption isotherm on Pt/C at 298 K. Saturation pressure  $P^0$  equals 3.1 kPa. Solid line provided to guide the eye.

#### S4. Adsorption Isotherms for CO and H<sub>2</sub> in the Absence of Water

Figure S6 provides the adsorption isotherms for H<sub>2</sub> and CO on Pt/C in the absence of H<sub>2</sub>O. Normalizing the molar uptakes by the Pt site density ( $11 \mu\text{mol-Pt}_{\text{surf}} \text{g}^{-1}$ ) gives the fractional coverages of adsorbates (x-axis of Figure 1a of the main text). For reference, adsorption isotherms and differential heats of CO adsorption on Pt/Al<sub>2</sub>O<sub>3</sub> standards are provided (Figure S7).

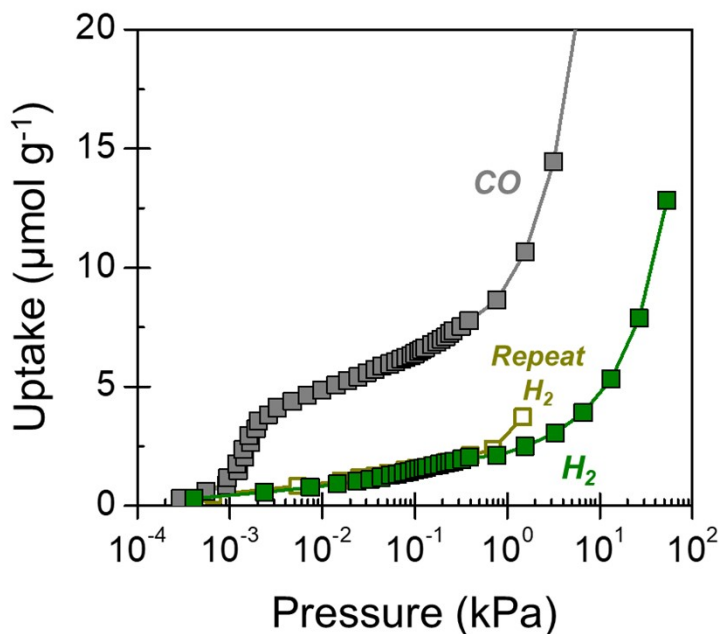

**Figure S6.** H<sub>2</sub> (green and gold) and CO (gray) adsorption isotherms in the absence of H<sub>2</sub>O (4.3 nm Pt/C, 298 K). Solid lines are provided to guide the eye.

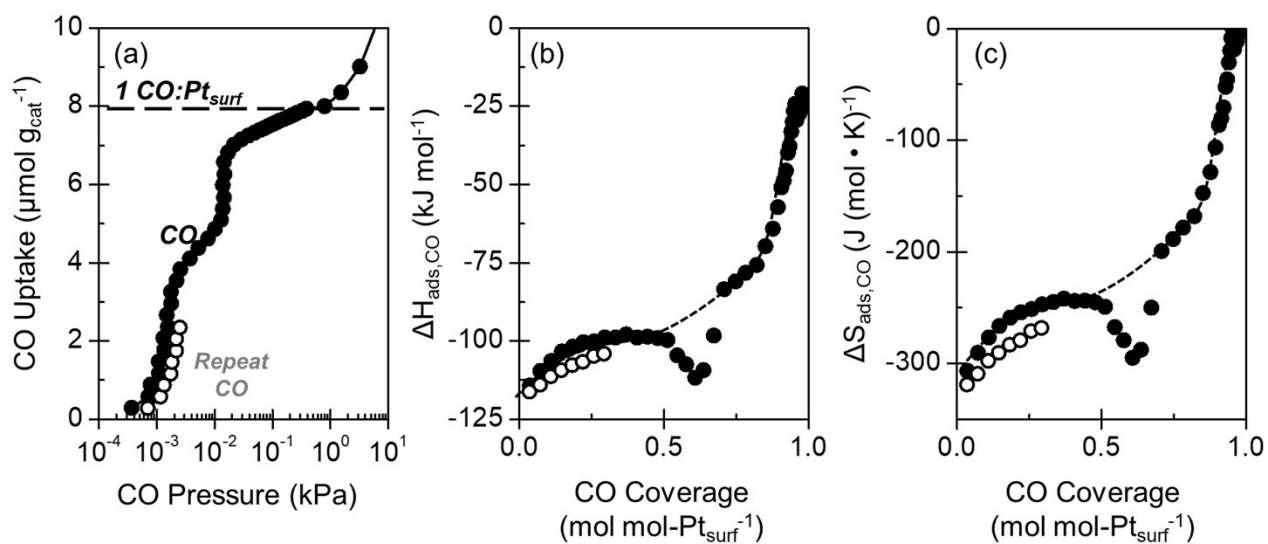

**Figure S7.** Adsorption isotherms (a), enthalpies ( $\Delta H_{\text{ads,CO}}$ , b), and entropies ( $\Delta S_{\text{ads,CO}}$ , c) for CO uptakes on Pt/Al<sub>2</sub>O<sub>3</sub> reference materials as a function of coverage in the absence of H<sub>2</sub>O (298 K). Dashed lines are provided to guide the eye.



## S5. Adsorption Isotherms for H<sub>2</sub> on Pt/C with Varying Water Activities

Figure S8 provides the H<sub>2</sub> adsorption isotherms on Pt/C at varying activities of water ( $a_{H_2O}$ ). Upon adding water, hydrogen uptakes vastly exceed their anhydrous counterparts, with a maximum uptake approaching 100  $\mu\text{mol-H}_2 \text{ g}^{-1}$  (20 mol-H (mol-Pt<sub>surf</sub>)<sup>-1</sup>). Normalizing the H<sub>2</sub> uptakes (Figure S8a) by the volumetric uptake of water (Figure S5) collapses the distinct adsorption isotherms to a single profile (Figure S8b). Instantaneous adsorption free energies  $\Delta G_{ads,H}$  at each distinct H<sub>2</sub> coverage were evaluated from this relation following Eqn. 4 of the main text.

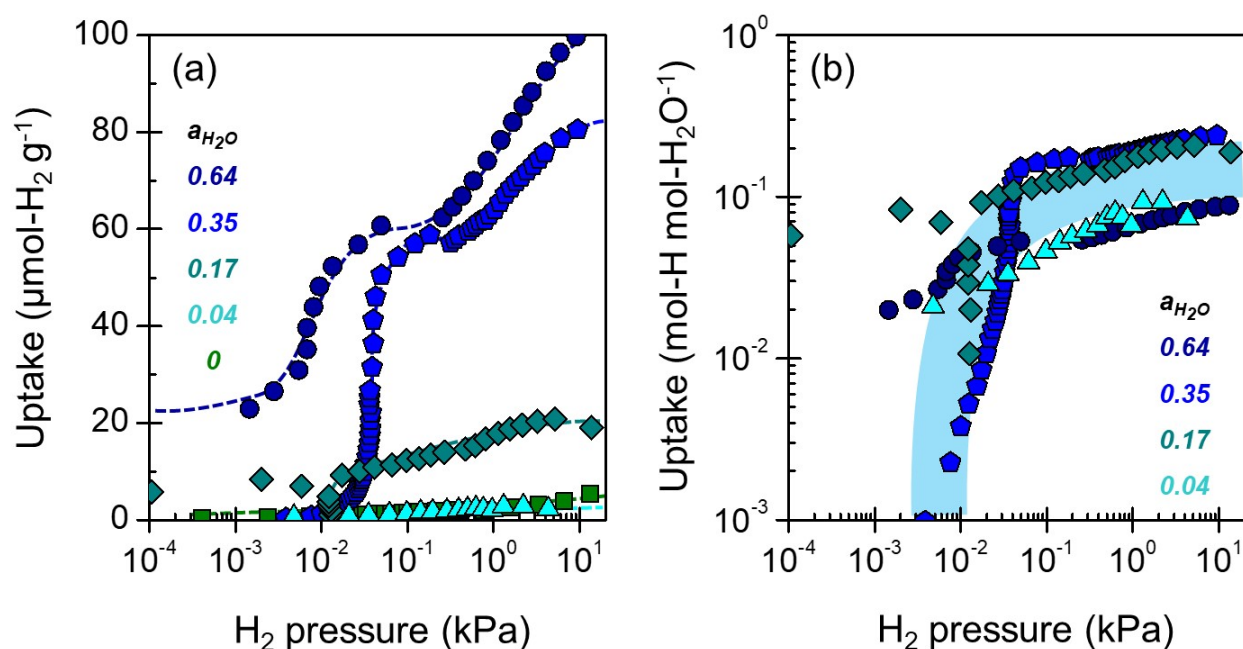

**Figure S8.** (a) Hydrogen adsorption isotherms with varying thermodynamic activities of H<sub>2</sub>O. (b) Hydrogen uptakes normalized by the quantity of adsorbed water (mol-H mol-H<sub>2</sub>O<sup>-1</sup>) versus H<sub>2</sub> pressure. 4.3 nm Pt/C, 298 K. Dashed and shaded lines are provided to guide the eye.

## **S6. Effects of Intraparticle Carbon Dilution on Uptakes and Heats of H<sub>2</sub> Adsorption on Pt/C**

Figure S9 provides the adsorption isotherms and differential heats of hydrogen adsorption on Pt/C with a 1-to-6.3 Pt/C-to-C (mass basis) intraparticle dilution, and either in the presence or absence of H<sub>2</sub>O. Under anhydrous conditions, adsorption isotherms are slightly offset to higher uptakes in the diluted sample. Hydrogen adsorption enthalpies approach zero before 1.0 mol-H (mol-Pt<sub>surf</sub>)<sup>-1</sup>, confirming that the offset in adsorption isotherms is not due to uptake on the bare C diluent. Exposing each catalyst to H<sub>2</sub>O at an activity of  $0.35 \pm 0.02$  gives the same H<sub>2</sub>O uptake normalized by the total sample mass (approximately 0.7 mmol-H<sub>2</sub>O g<sup>-1</sup>, Figure S5). Hydrogen uptakes for these two samples reach comparable values when normalized by the number of Pt sites but a large offset when normalized by the number of H<sub>2</sub>O molecules. In the absence of electrical connectivity between Pt/C particles and C diluents, this diluent effect agrees with the capacitive interaction mechanism of Scheme 2.

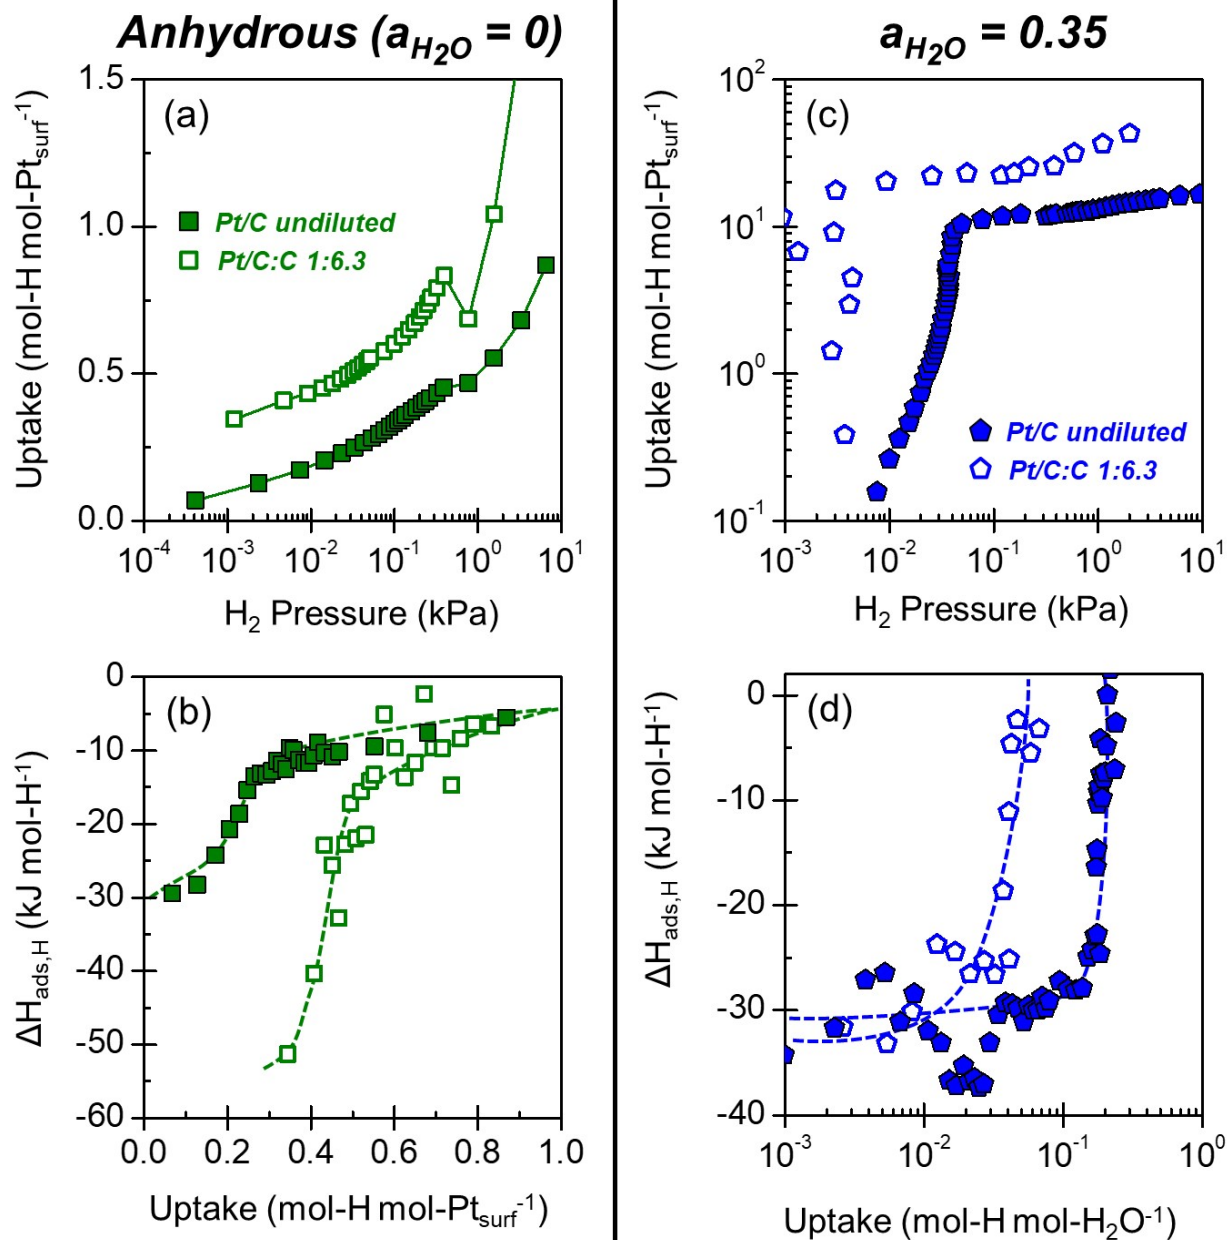

**Figure S9.** Effects of a 7-fold intraparticle dilution of Pt/C with C (undiluted: solid points, diluted: hollow points) under (a–b) anhydrous and (c–d) H<sub>2</sub>O containing conditions (H<sub>2</sub>O activity of 0.35) on (a or c) hydrogen uptakes normalized per Pt surface sites and (b or d) adsorption enthalpies as a function of H uptakes per Pt (b) or per H<sub>2</sub>O (d). 1.0 g total 4.3 nm Pt/C or Pt/C + C, 298 K.

## S7. Differential Enthalpies, Entropies, and Free Energies for Hydrogen Adsorption on Pt/C

Figure S10 provides the hydrogen adsorption enthalpies ( $\Delta H_{ads,H}$ ), entropies ( $\Delta S_{ads,H}$ ), and free energies ( $\Delta G_{ads,H}$ ) evaluated at varying hydrogen coverages and water activities. Instantaneous  $\Delta G_{ads,H}$  values vary minimally among all conditions.

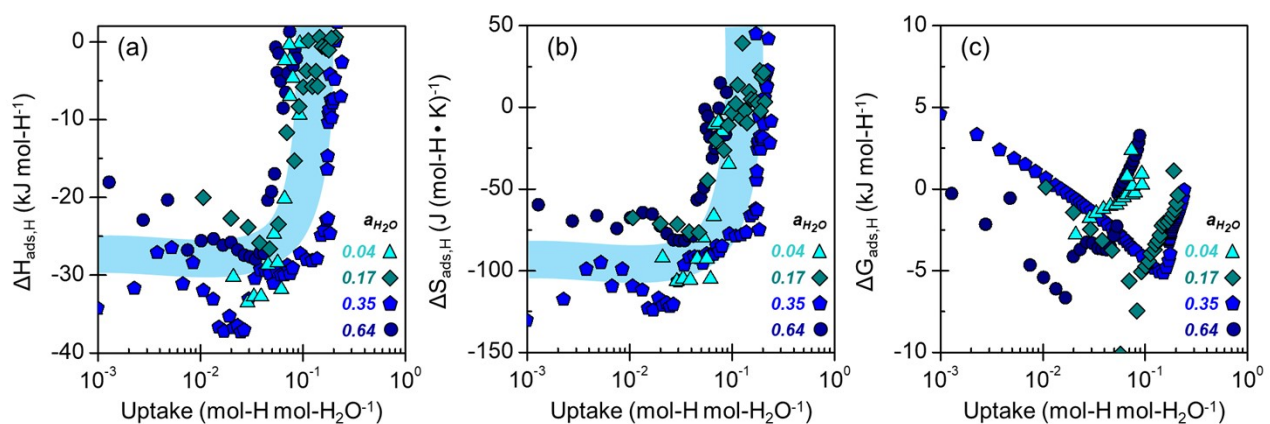

**Figure S10.** Hydrogen adsorption enthalpies (a,  $\Delta H_{ads,H}$ ), entropies (b,  $\Delta S_{ads,H}$ ), and free energies (c,  $\Delta G_{ads,H}$ ) as a function of hydrogen coverage normalized by the quantity of adsorbed water. 4.3 nm Pt/C, 298 K. Shaded lines are provided to guide the eye.

## S8. Gas Phase Batch Profiles and CO Consumption Rates on Pt/C

Figure S11 provides the batch CO consumption profiles and derived CO consumption rates ( $-r_{CO}$ ) on Pt/C with varying  $H_2O$  activity. The emergence of new  $H_2O$ -assisted activation pathways leads to  $-r_{CO}$  values which increase by nearly an order of magnitude upon  $H_2O$  introduction, analogous to the findings for  $H_2$  adsorption (Figure 2 of the main text).

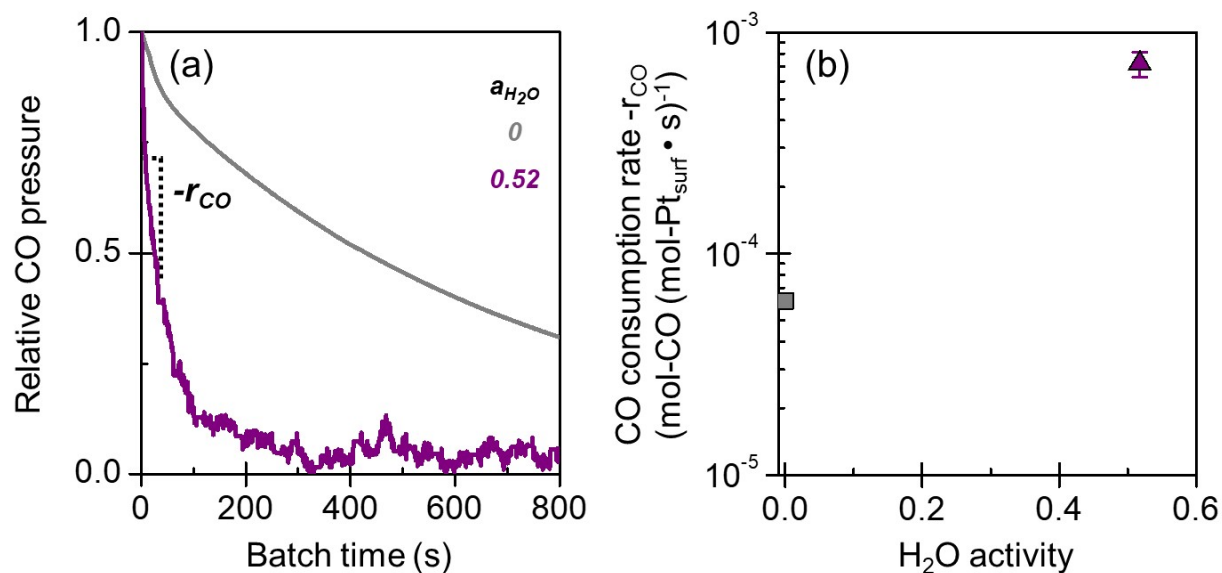

**Figure S11.** (a) Gas phase batch profiles for CO molar consumption and (b) initial rates of CO consumption with varying thermodynamic activities of  $H_2O$ . 4.3 nm Pt/C, 298 K. Error margins reflect 95% confidence intervals of five CO doses.

## S9. Adsorption Isotherms and Differential Heats for CO Adsorption on Pt/C with Water

Figure S12 provides the isotherms, enthalpies ( $\Delta H_{ads,CO}$ ), and entropies ( $\Delta S_{ads,CO}$ ) for CO adsorption in the presence of water ( $a_{H_2O} = 0.52$ ) on Pt/C.  $\Delta S_{ads,CO}$  values were estimated from a capacitive adsorption model analogous to Scheme 2 of the main text, treating H<sub>2</sub>O as the active site. Saturation CO uptakes (defined when  $\Delta H_{ads,CO}$  reaches 0 kJ mol<sup>-1</sup>) exceed the monolayer coverage of Pt, equaling 5 mol-CO (mol-Pt<sub>surf</sub>)<sup>-1</sup>, likely due to CO spillover onto the carbon support facilitated by H<sub>2</sub>O. Upon introducing H<sub>2</sub>O, adsorption enthalpies extrapolated to zero coverage weaken by introducing water ( $\Delta H_{ads,CO}$  increasing from  $-91 \pm 4$  kJ mol<sup>-1</sup> to  $-50 \pm 10$  kJ mol<sup>-1</sup>), likely due to dipole and van der Waal's interactions between CO and H<sub>2</sub>O that weaken the Pt-C bonds in CO adsorbed states.

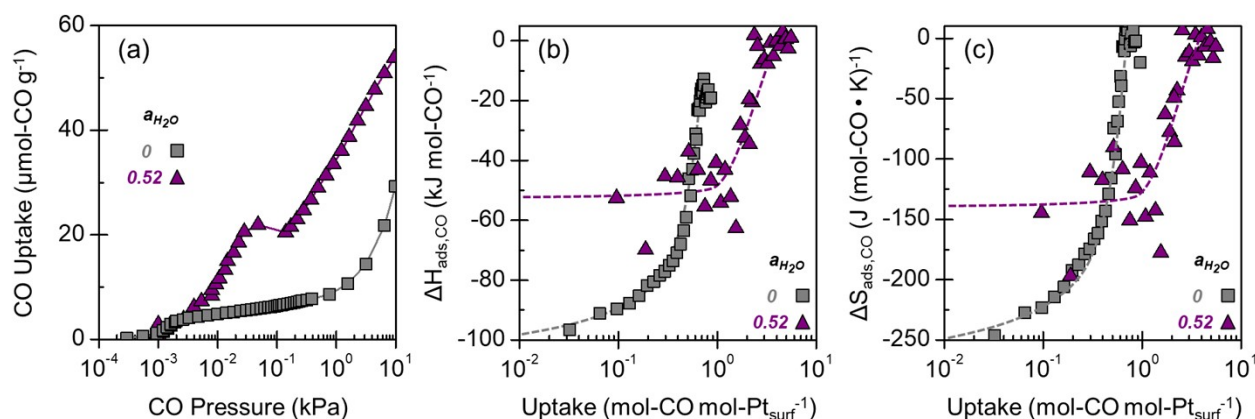

**Figure S12.** Effects of H<sub>2</sub>O on (a) CO molar uptakes as a function of pressure, (b) CO adsorption enthalpies, and (c) CO adsorption entropies as a function of CO coverage. 4.3 nm Pt/C, 298 K. Dashed and solid lines are provided to guide the eye.
